# Supplementary material for: 99mTc-macroaggregated albumin SPECT/CT predictive dosimetry and dose-response relationship in uveal melanoma liver metastases treated with first-line selective internal radiation therapy
Source: PubMed Central journal article supplement (PMC10423257; doi:10.1038/s41598-023-39994-7), 2023-08-12
Supplement: 41598_2023_39994_MOESM1_ESM.pdf [file 41598_2023_39994_MOESM1_ESM.pdf]

## SUPPLEMENTARY MATERIAL

**Supplementary TABLE 1:** Main acquisition and reconstruction parameters for treatment planning with  $^{99m}\text{Tc}$ -MAA SPECT/CT.

| SPECT/CT      | Number of frames | Frame duration (s) | Reconstruction algorithm (iterations x subsets) | Post-reconstruction filter               | Corrections | Low-energy scatter window | Image matrix | Voxel size (mm) |
|---------------|------------------|--------------------|-------------------------------------------------|------------------------------------------|-------------|---------------------------|--------------|-----------------|
| Discovery 670 | 120              | 15                 | OSEM (2x10)                                     | Butterworth fc =0.48 cycles/cm; ordre 10 | AC/SC       | (120 keV $\pm$ 10%)       | 128x128      | 4.42x4.42x4.42  |
| Symbia Intevo | 120              | 15                 | OSCGM (40x1)                                    | Gaussian FWHM =5 mm                      | AC/SC/RR    | (120 keV $\pm$ 10%)       | 256x256      | 1.95x1.95x1.95  |

**Supplementary TABLE 2:** Main acquisition and reconstruction parameters for treatment verification  $^{90}\text{Y}$ -PET/CT. Acquisitions were performed in list-mode. All pertinent image corrections, (normalization, dead time, activity decay, random coincidences, attenuation and scatter corrections) were applied.

| PET/CT              | Time per bed (min) | Recon. Algorithm (iterations x subsets) | Scatter Model | PSF | TOF | Post-recon. Gaussian filter (FWHM mm) | Image matrix | Voxel size (mm) |
|---------------------|--------------------|-----------------------------------------|---------------|-----|-----|---------------------------------------|--------------|-----------------|
| Discovery 690       | 30                 | OSEM (3x16)                             | Absolute      | no  | yes | 5                                     | 256x256      | 2.73x2.73x3.27  |
| Biograph Vision 600 | 15                 | OSEM (2x5)                              | Absolute      | yes | yes | 4                                     | 220x220      | 3.3x3.3x2       |

In SPECT/CT and PET/CT devices, we obtained recovery coefficients (RC) as a function of size from a phantom experiment in which a NEMA/IEC NU2 test object. For  $^{99m}\text{Tc}$  SPECT/CT experiments, the phantom was filled with 5kBq/mL in the main volume (9.7L) while for  $^{90}\text{Y}$  PET/CT experiments, the phantom background was filled with 1MBq/mL. Spherical inserts were filled with a 10x and a 5x higher activity concentration in SPECT and PET experiments, respectively. The size and RC values obtained for the six spherical inserts are reported in **Supplementary TABLE 3**. RC data were fitted with a hyperbole function:  $\text{RC}(\text{sph\_vol}) = \text{C1} + \text{C2}/(\text{sph\_vol} + \text{C3})$  as

displayed in **Supplementary Figure1**. The fit parameters (C1, C2 and C3) were obtained by minimizing a cost function implemented in the fminsearch function of Matlab used at this scope.

The acquired PET phantom data was reconstructed using the same parameters used for patients.

**Supplementary TABLE 3:** Recovery coefficients and RC fit parameters obtained for the four imaging devices involved in the study.

| Sphere size ( $\varnothing$ in mm) | 10   | 13   | 17   | 22   | 28    | 37    | Fit parameters |       |       |
|------------------------------------|------|------|------|------|-------|-------|----------------|-------|-------|
| Sphere volume (mL)                 | 0.52 | 1.15 | 2.57 | 5.57 | 11.49 | 26.51 | C1             | C2    | C3    |
| RC: SPECT Discovery 670            | 0.15 | 0.22 | 0.38 | 0.44 | 0.60  | 0.70  | 0.994          | 7.418 | 8.078 |
| RC: SPECT Symbia Intevo            | 0.13 | 0.22 | 0.38 | 0.51 | 0.69  | 0.80  | 0.998          | 5.083 | 5.248 |
| RC: PET Discovery 690              | 0.15 | 0.35 | 0.41 | 0.53 | 0.68  | 0.81  | 0.985          | 4.291 | 4.643 |
| RC: PET Biograph Vision 600        | 0.25 | 0.43 | 0.61 | 0.71 | 0.72  | 0.84  | 0.944          | 1.554 | 1.682 |

**Supplementary TABLE 4:** Changes in target tumor parameters following SIRT.

|                    | <b>Pre-SIRT<br/>Median [IQR]</b> | <b>Post-SIRT<br/>Median [IQR]</b> | <b>p-value</b> |
|--------------------|----------------------------------|-----------------------------------|----------------|
| Surface            | 2.5 [1.32-4.36]                  | 1.6 [1.04-3.88]                   | 0.0003         |
| Diameter           | 1.8 [1.30-2.25]                  | 1.4 [1.15-2.25]                   | 0.0006         |
| Volume             | 4.8 [1.25-8.56]                  | 2.6 [0.85-5.69]                   | <0.0001        |
| Enhancing diameter | 1.6 [1.20-2.30]                  | 1.3 [0.70-2.00]                   | 0.0004         |
| Enhancing surface  | 1.4 [0.54-4.40]                  | 0.5 [0.24-1.60]                   | 0.0004         |
| TLG                | 16.6 [10.2-25.7]                 | 13.5 [4.5-23.5]                   | 0.0025         |
| SUVmax             | 6.6 [3.78-8.11]                  | 4.6 [3.45-6.94]                   | 0.0017         |
| SUVmean            | 4.2 [2.88-4.84]                  | 3.3 [2.67-4.12]                   | 0.0041         |
| SUVpeak            | 5.0 [3.01-5.88]                  | 3.8 [2.84-4.77]                   | 0.0036         |

Note: significance level:  $p_{\text{uncorr}} < 0.05$ ,  $p_{\text{corr}} < 0.0045$

**Supplementary TABLE 5:** Changes in target tumor parameters following SIRT according to the <sup>18</sup>F-FDG positive/negative status.

| Variables          | <sup>18</sup> F-FDG negative<br>Median [IQR] |                  | <i>p</i> -value | <sup>18</sup> F-FDG positive<br>Median [IQR] |                 | <i>P</i> -value |
|--------------------|----------------------------------------------|------------------|-----------------|----------------------------------------------|-----------------|-----------------|
|                    | Pre-SIRT                                     | Post-SIRT        |                 | Pre-SIRT                                     | Post-SIRT       |                 |
| Surface            | 1.7 [1.00-3.09]                              | 1.3 [0.59-2.16]  | 0.025           | 2.8 [1.92-5.00]                              | 1.6 [1.14-4.37] | 0.0030          |
| Diameter           | 1.5 [1.05-1.85]                              | 1.2 [0.95-1.65]  | 0.035           | 1.9 [1.50-2.45]                              | 1.5 [1.20-2.35] | 0.0048          |
| Volume             | 1.1 [0.76-2.85]                              | 0.9 [0.41-1.99]  | 0.069           | 5.6 [1.69-9.57]                              | 3.6 [1.60-6.83] | 0.0002          |
| Enhancing diameter | 1.2 [0.90-1.40]                              | 0.9 [0.60-1.20]  | 0.10            | 1.9 [1.40-2.35]                              | 1.5 [1.05-2.30] | 0.0018          |
| Enhancing surface  | 0.7 [0.24-1.26]                              | 0.4 [0.14-0.63]  | 0.051           | 2.1 [0.58-4.73]                              | 0.5 [0.34-1.82] | 0.0018          |
| TLG                | 13.4 [9.3-19.1]                              | 15.8 [10.2-22.1] | 0.72            | 16.7 [10.9-35.9]                             | 12.8 [1.7-23.5] | 0.0033          |
| SUVmax             | 3.4 [2.87-3.74]                              | 4.3 [3.84-4.51]  | 0.47            | 7.5 [6.55-8.58]                              | 5.5 [1.70-7.21] | 0.0010          |
| SUVmean            | 2.6 [2.20-2.84]                              | 2.9 [2.71-3.05]  | 0.47            | 4.5 [4.04-5.01]                              | 3.6 [1.36-4.27] | 0.0020          |
| SUVpeak            | 2.7 [2.45-2.95]                              | 3.1 [2.84-3.59]  | 0.47            | 5.3 [4.52-6.26]                              | 4.3 [1.45-5.24] | 0.0015          |

Note: significance level:  $P_{\text{uncorr}} < 0.05$ ,  $P_{\text{corr}} < 0.0023$

**SUPPLEMENTARY Fig. 1**

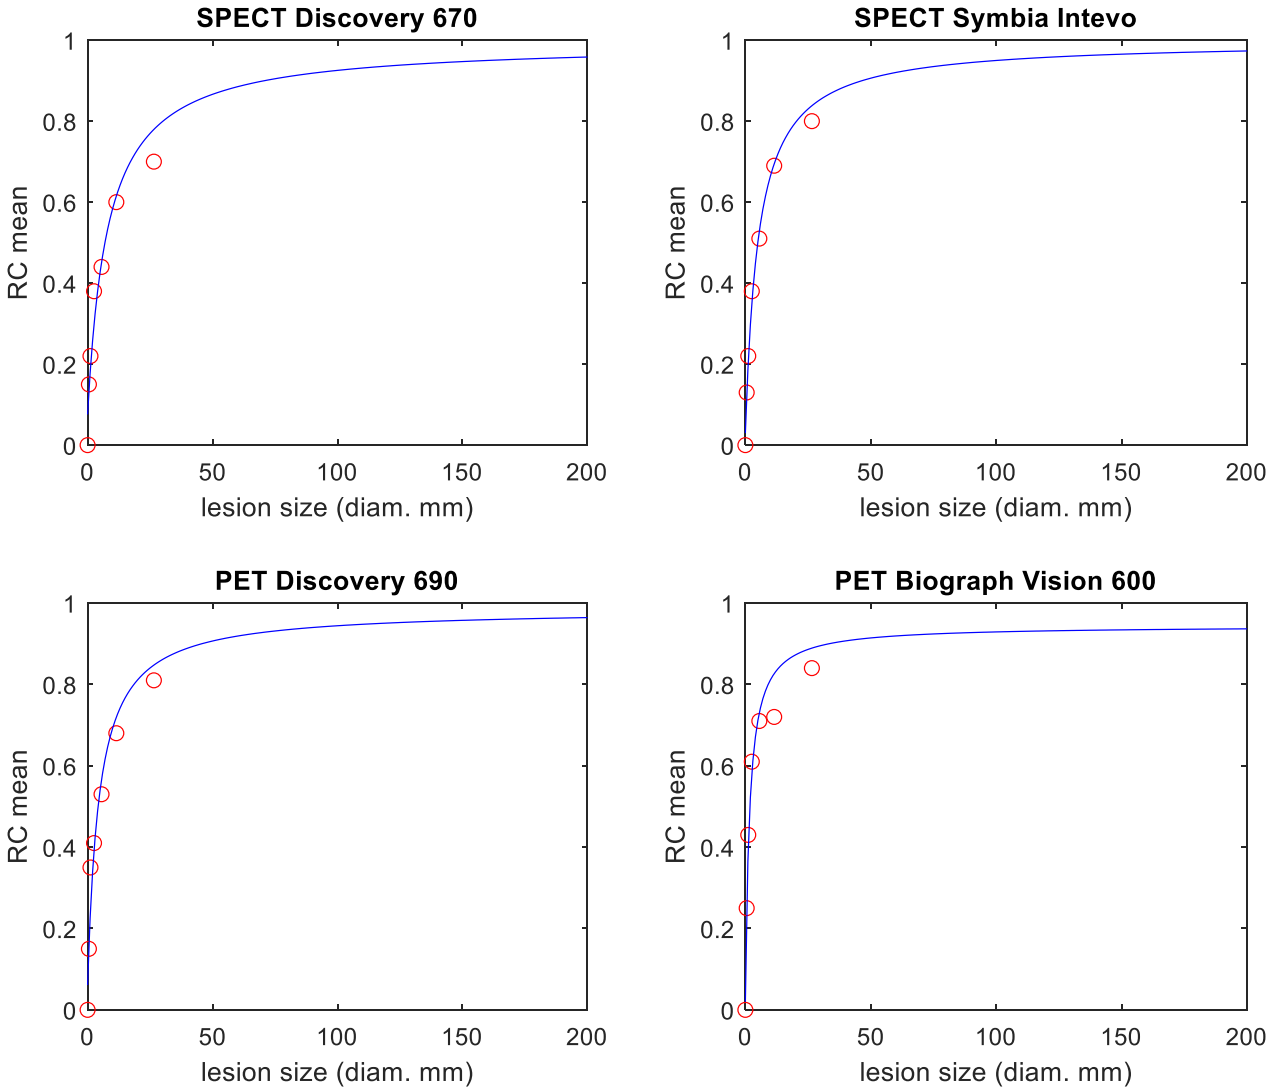

Recovery coefficients obtained from NEMA phantom experiments (red circles) and RC hyperbole fits (curves in blue) obtained for the four imaging devices involved in the study

SUPPLEMENTARY Fig. 2

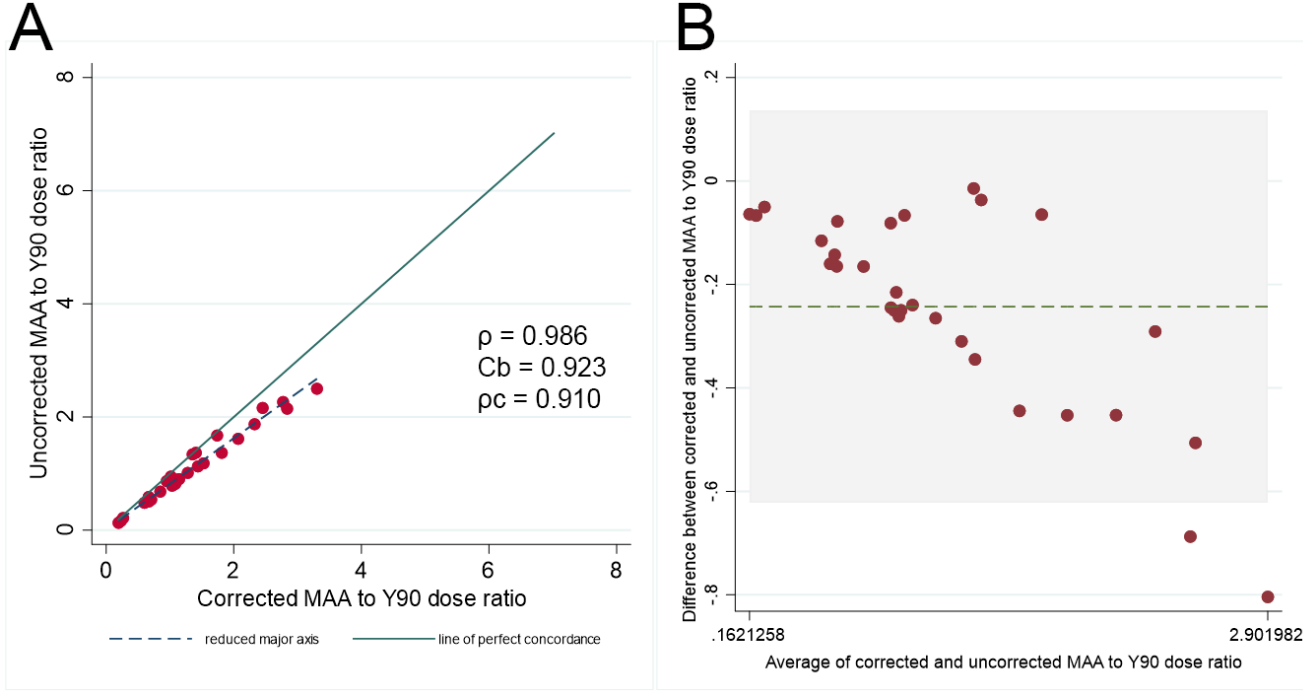

(A) Lin's concordance correlation coefficient of predicted to actual dose ratio with and without correction for the recovery coefficient. Precision ( $\rho$ ) and systematic bias ( $C_b$ ) were excellent. (B) Bland-Altman plot comparing agreement of predicted to actual dose ratio with and without correction for the recovery coefficient. The agreement was good with a mean difference of -0.24 (0.19 SD; 95%CI: -0.62-0.14)

**SUPPLEMENTARY Fig. 3**

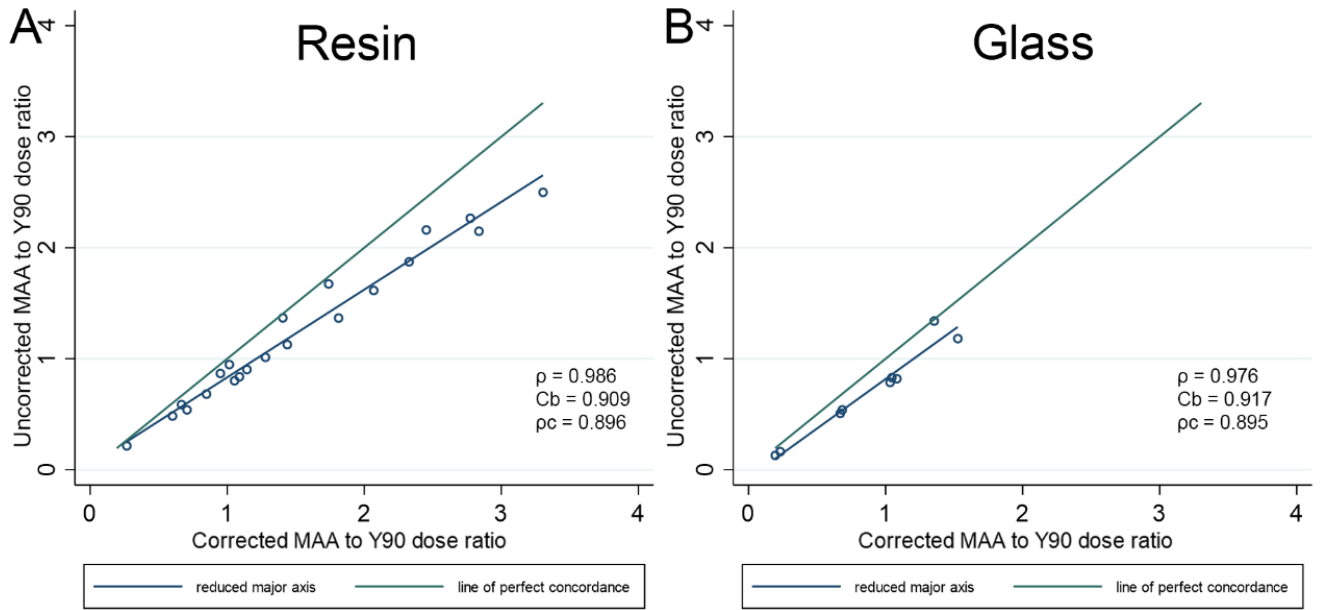

(A) Lin's concordance correlation coefficient of predicted to actual dose ratio with and without correction for the recovery coefficient for resin (A) and glass (B) microspheres.

Precision ( $\rho$ ) and systematic bias ( $C_b$ ) were excellent
